# Supplementary material for: Cytochrome oxidase requirements in Bordetella reveal insights into evolution towards life in the mammalian respiratory tract
Source: PubMed Central journal article supplement (PMC11257404; doi:10.1371/journal.ppat.1012084), 2024-07-08
Supplement: ppat.1012084.s005.pdf [file ppat.1012084.s005.pdf]

A.

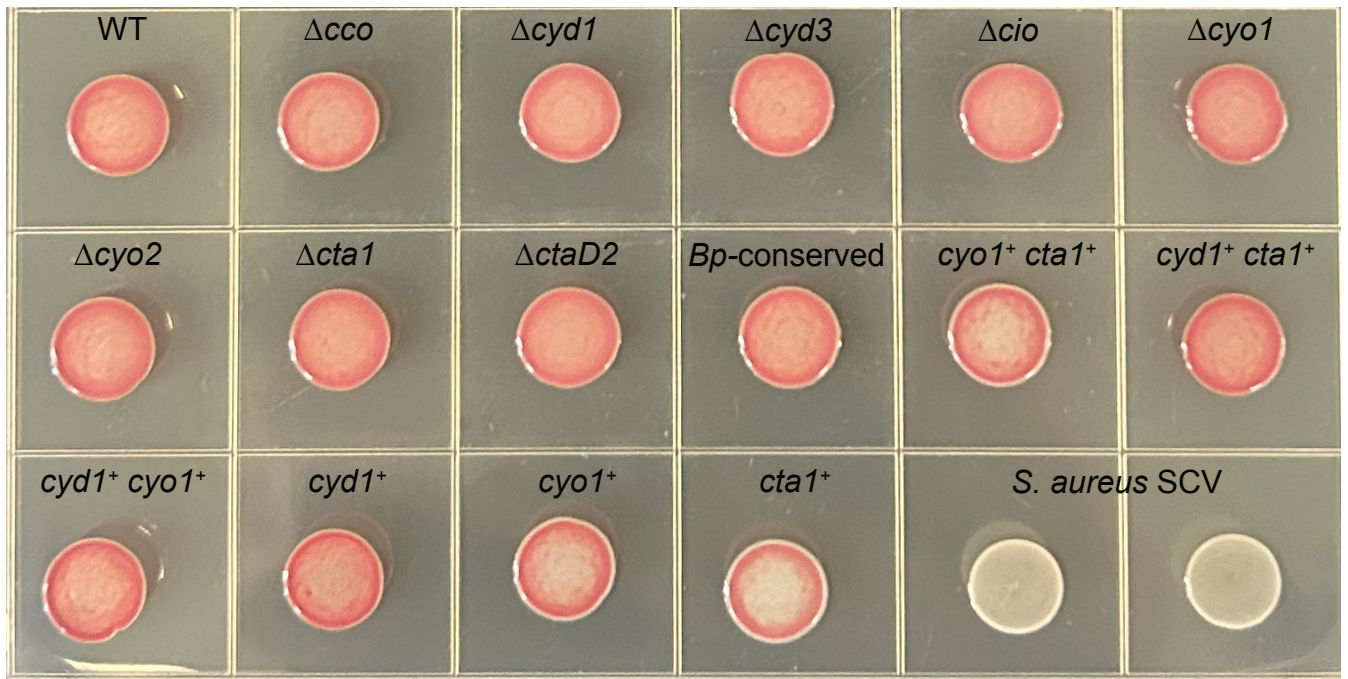

B.

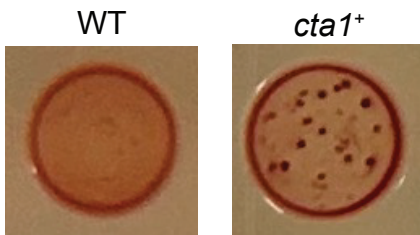

**S3 Fig.** All generated strains respire. TTC reduction after 24 hours of growth. Cultures were normalized to 1 OD<sub>600</sub>/mL before spotting. When reduced, TTC undergoes an irreversible color change to red. A *Staphylococcus aureus menD* mutant (*S. aureus* SCV), which cannot respire, was included as a negative control. (A) Representative images of TTC reduction from 7 total biological replicates per strain. (B) In 4 out of 7 biological replicates,  $cta1^+$  (right) had spots within the colony biofilm with a higher density of reduced TTC than WT (left). Raw data: <https://doi.org/10.15139/S3/M7S90J>
