# Supplementary material for: Cytochrome oxidase requirements in Bordetella reveal insights into evolution towards life in the mammalian respiratory tract
Source: PubMed Central journal article supplement (PMC11257404; doi:10.1371/journal.ppat.1012084), 2024-07-08
Supplement: ppat.1012084.s006.pdf [file ppat.1012084.s006.pdf]

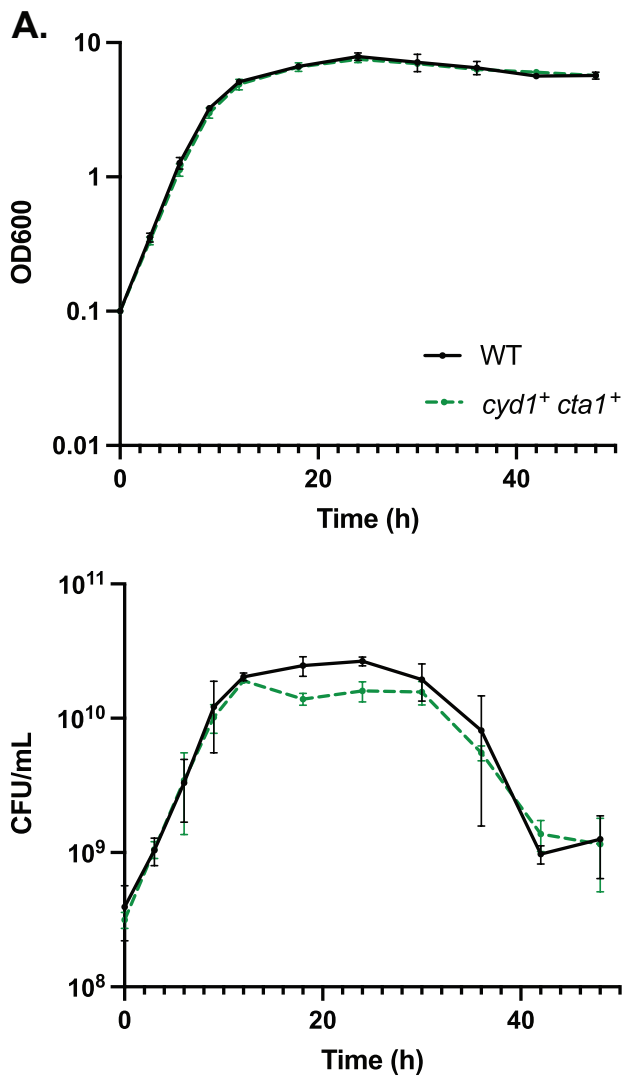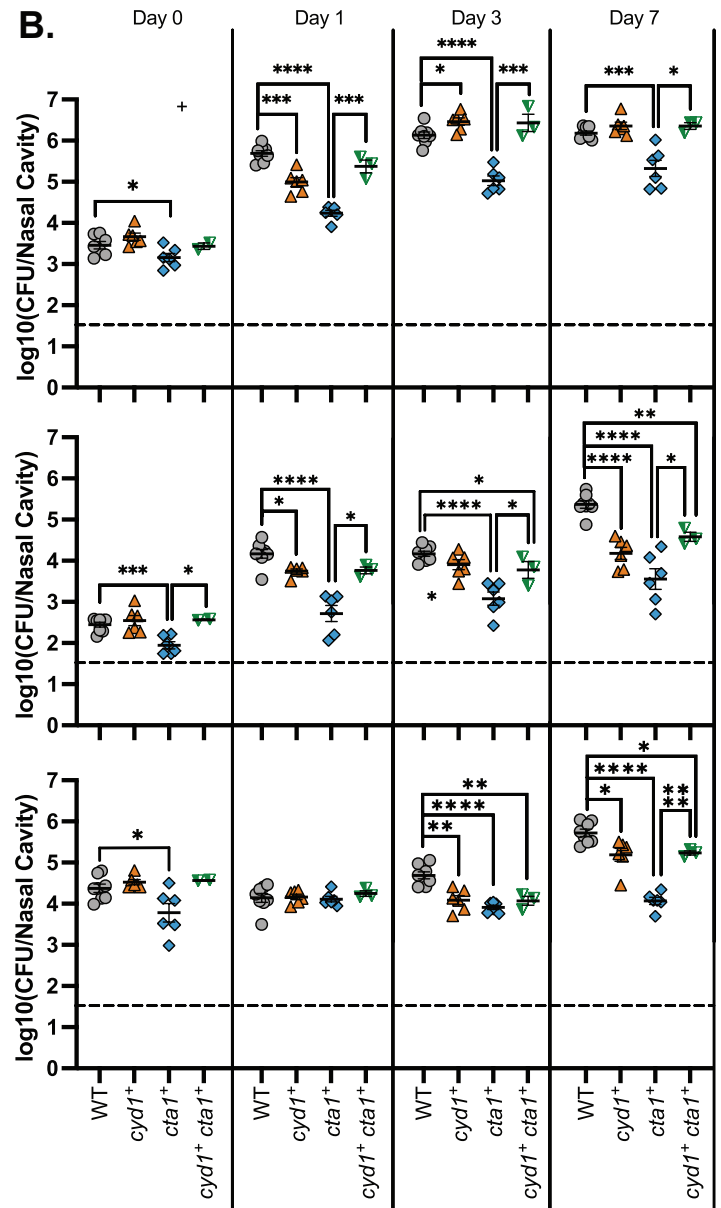

**S4 Fig.** *cyd1<sup>+</sup> cta1<sup>+</sup>* phenocopies *cyd1<sup>+</sup>* during infection. (A) Growth over time, measured via optical density (left) or CFU/mL (right), for a strain with only *cydAB1* and *ctaCDFGE1* (*cyd1<sup>+</sup> cta1<sup>+</sup>*) versus RB50 (WT). (B) Bacterial burden over time within the nasal cavity of mice infected with wild-type bacteria (WT, grey circles) or *cyd1<sup>+</sup> cta1<sup>+</sup>* (green upside-down triangles). Data for the strain with only *cydAB1* (*cyd1<sup>+</sup>*, orange upright triangles) and the strain with only *ctaCDFGE1* (*cta1<sup>+</sup>*, blue diamonds) are included for comparison and are identical to the data presented in Figure 5, along with the WT controls from the same experiment. This experiment was performed concurrently with the experiment shown in Figure 4; thus, all additional WT data are identical between these two figures. n=2 for day 0, n=4 for all other timepoints for *cyd1<sup>+</sup> cta1<sup>+</sup>*. Each point represents a single mouse. Dashed line represents the limit of detection. Statistical significance was determined using unpaired Student's t-test. \*, p < 0.05; \*\*, p < 0.005; \*\*\*, p < 0.0005; \*\*\*\*, p < 0.0001. Raw data: <https://doi.org/10.15139/S3/X7T09R> (S4A Fig); <https://doi.org/10.15139/S3/QOJ78U> (S4B Fig)
