# Supplementary material for: Cytochrome oxidase requirements in Bordetella reveal insights into evolution towards life in the mammalian respiratory tract
Source: PubMed Central journal article supplement (PMC11257404; doi:10.1371/journal.ppat.1012084), 2024-07-08
Supplement: ppat.1012084.s007.pdf [file ppat.1012084.s007.pdf]

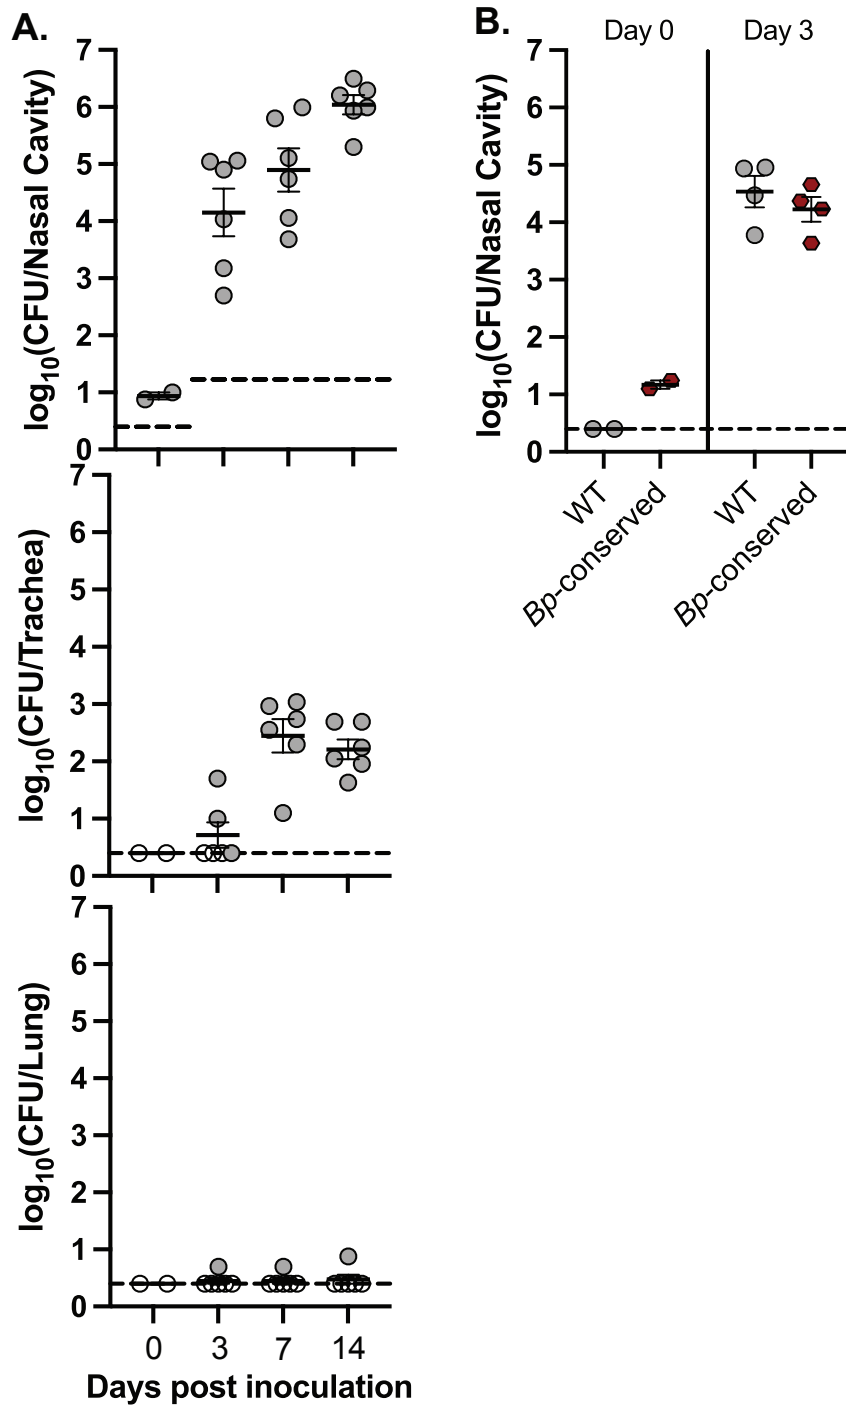

**S5 Fig.** The three cytochrome oxidases conserved in *B. pertussis* are sufficient for colonization in mice. (A) Bacterial burden over time within the nasal cavity (upper), trachea (middle), and right lung (lower) of mice infected with wild-type bacteria (WT, grey circles). Open circles represent tissue samples with no detectable bacteria.  $n=2$  for day 0,  $n=6$  for all other timepoints. (B) Bacterial burden over time within the nasal cavity of mice infected with wild-type bacteria (WT, grey circles) or a strain with only the cytochrome oxidase-encoding gene loci conserved in *B. pertussis* (*Bp*-conserved, maroon hexagon).  $n=2$  for day 0,  $n=4$  for day 3. Each point represents a single mouse. Dashed line represents the limit of detection. Open symbols represent samples below the limit of detection. Statistical significance was determined using unpaired Student's t-test;  $p$ -values are indicated when  $p < 0.05$ . Raw data: <https://doi.org/10.15139/S3/EGWSWQ>
